# Supplementary material
Source: PubMed Central journal article supplement (PMC3346457)
Supplement: supp_78.9.3480_AEM-AEM00058-12-s01.pdf [file supp_78.9.3480_AEM-AEM00058-12-s01.pdf]

1 **Supplemental Material for:**

2  
3 **The Relative Catalytic Efficiency of *ldhL*- and *ldhD*-Encoded**  
4 **Products is Crucial for the Optical Purity of Lactic Acid**  
5 **Produced by *Lactobacillus* Strains**

6  
7 Zhaojuan Zheng,<sup>1</sup> Binbin Sheng,<sup>1</sup> Cuiqing Ma,<sup>1\*</sup> Haiwei Zhang,<sup>1</sup>

8 Chao Gao,<sup>1,2</sup> Fei Su,<sup>2</sup> and Ping Xu<sup>1,2\*</sup>

9  
10 *State Key Laboratory of Microbial Technology, Shandong University, Jinan 250100, People's*

11 *Republic of China*<sup>1</sup>; *and State Key Laboratory of Microbial Metabolism, Shanghai Jiao Tong*

12 *University, Shanghai 200240, People's Republic of China*<sup>2</sup>

13  
14 \*Corresponding authors:

15 Mailing address for C. Ma: State Key Laboratory of Microbial Technology, Shandong

16 University, Jinan 250100, People's Republic of China. Phone: +86-531-88364003;

17 Fax: +86-531-88369463; E-mail: macq@sdu.edu.cn.

18 Mailing address for P. Xu: School of Life Sciences and Biotechnology, Shanghai Jiao

19 Tong University, Shanghai 200240, People's Republic of China. Phone:

20 +86-21-34206647; Fax: +86-21-34206723; E-mail: pingxu@sjtu.edu.cn.

21

## 22 SUPPLEMENTARY METHODS

23 **Batch fermentation.** To determine the exact optical purity of lactic acid produced  
24 by the 3 representative *Lactobacillus* strains, *L. bulgaricus* ATCC 11842, *L.*  
25 *plantarum* ATCC 14917, and *L. casei* ATCC 334, batch fermentation was performed  
26 in 100-ml flasks containing 50 ml of MRS media with 1% CaCO<sub>3</sub> as neutralizing  
27 agent. The cultures were incubated at 37°C for 24 h without agitation. Thereafter, the  
28 concentration and optical purity of lactic acid were analyzed by high-performance  
29 liquid chromatography (HPLC).

30 **L-nLDH and D-nLDH assays.** The reduction activities of purified L- and D-nLDHs  
31 on pyruvate were assayed at 37°C in 1 ml of 50 mM Tris-HCl buffer (pH 7.0), 0.2  
32 mM NADH, 5 mM fructose 1,6-bisphosphate (FDP), 10 mM MnSO<sub>4</sub>, appropriate  
33 concentrations of pyruvate and the enzyme. The rate of NADH oxidation was  
34 determined by measuring the absorbance change at 340 nm. One unit of L- or  
35 D-nLDHs was defined as the amount that catalyzed the oxidation of 1 μmol NADH  
36 per minute (14). For the determination of L- and D-nLDHs in whole cell extracts of  
37 *Lactobacillus* strains, cells in the middle of the exponential phase were collected by  
38 centrifugation, washed with 0.85% (w/v) sodium chloride solution, subsequently  
39 suspended in 50 mM Tris-HCl buffer (pH 7.0) and then disrupted by sonication. The  
40 reduction activities of L- and D-nLDHs were assayed in a reaction mixture containing  
41 20 mM pyruvate, 20 mM NADH and 0.1 mg ml<sup>-1</sup> whole cell extracts at 37°C for 10  
42 min. Thereafter, activities of nLDHs were inactivated by boiling for 5 min. Then, L-  
43 and D-lactic acid was detected by HPLC with a chiral column. Activities of L- and

44 D-nLDHs in *Lactobacillus* strains were calculated by the corresponding  
45 concentrations of L- and D-lactic acid.

46 **Analytical procedures.** Lactic acid concentration was measured by HPLC (Agilent  
47 1100 series, Hewlett-Packard, USA) equipped with a Bio-Rad Aminex HPX-87H  
48 column (300 × 7.8 mm) and a refractive index detector. Analysis was performed with  
49 a mobile phase of 10 mM H<sub>2</sub>SO<sub>4</sub> at a flow rate of 0.4 ml min<sup>-1</sup> at 55°C.  
50 Stereoselective assays of L-lactic acid and D-lactic acid were performed by HPLC  
51 equipped with a chiral column (MCI GEL CRS10W, Japan) and a tunable UV  
52 detector at 254 nm. The mobile phase was 2 mM CuSO<sub>4</sub> at a flow rate of 0.5 ml min<sup>-1</sup>  
53 and at 25°C. The optical purity of L-lactic acid was described as enantiomeric excess  
54 (ee) value which was defined as  $\frac{(\text{L-lactic acid}) - (\text{D-lactic acid})}{(\text{L-lactic acid}) + (\text{D-lactic acid})} \times 100\%$ . Similarly, the  
55 optical purity of D-lactic acid was also described as ee value which was defined as

56  $\frac{(\text{D-lactic acid}) - (\text{L-lactic acid})}{(\text{D-lactic acid}) + (\text{L-lactic acid})} \times 100\%$ .

57

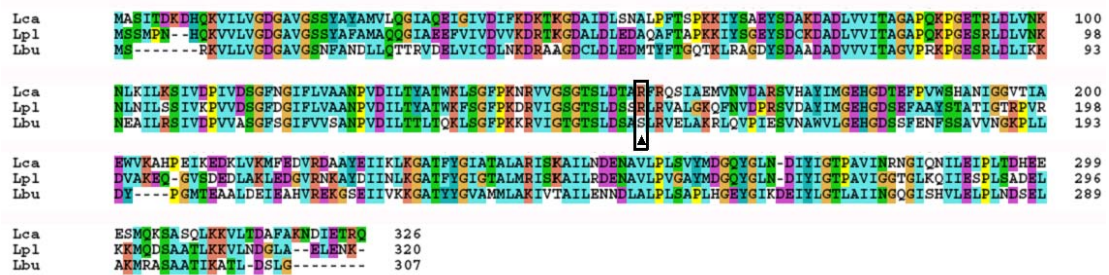

58

59 FIG. S1. Multiple alignment of amino acid sequences of the cloned L-nLDHs. Species and  
60 accession numbers of sequences were shown in Table S2. Lbu, *L. bulgaricus* ATCC 11842; Lpl, *L.*  
61 *plantarum* ATCC 14917; Lca, *L. casei* ATCC 334. Symbols represent: ▲, Arg171.

62 There is considerable sequence identity between L-nLDHs of different types of  
63 *Lactobacillus* stains (L-nLDHs of *L. bulgaricus* ATCC 11842 and *L. plantarum* ATCC  
64 14917, 53%; L-nLDHs of *L. bulgaricus* ATCC 11842 and *L. casei* ATCC 334, 50%;  
65 L-nLDHs of *L. plantarum* ATCC 14917 and *L. casei* ATCC 334, 69%). The crystal  
66 structure of L-nLDHs had been solved and residues responsible for substrate binding  
67 and catalysis had been identified in previous reports (2, 6, 7, 12). The results revealed  
68 that Arg171 is a crucial residue at the substrate-binding site and promotes pyruvate  
69 binding (4, 5, 6). But for L-nLDH of *L. bulgaricus* ATCC 11842, Arg171 was  
70 substituted by Ser, which suppressed its activity inevitably.

71

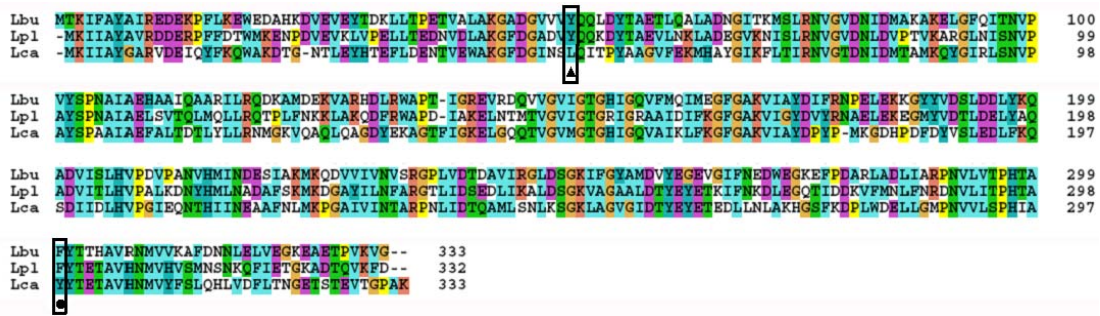

72

73 FIG. S2. Multiple alignment of amino acid sequences of the cloned D-nLDHs. Species and  
 74 accession numbers of sequences were shown in Table S2. Lbu, *L. bulgaricus* ATCC 11842; Lpl, *L.*  
 75 *plantarum* ATCC 14917; Lca, *L. casei* ATCC 334. Symbols represent: ▲, Tyr52; ●, Phe299.

76 There is considerable sequence identity between D-nLDHs of different types of  
 77 *Lactobacillus* strains (D-nLDHs of *L. bulgaricus* ATCC 11842 and *L. plantarum*  
 78 ATCC 14917, 53%; D-nLDHs of *L. bulgaricus* ATCC 11842 and *L. casei* ATCC 334,  
 79 39%; D-nLDHs of *L. plantarum* ATCC 14917 and *L. casei* ATCC 334, 44%). The  
 80 crystal structure of D-nLDHs had been solved and residues responsible for substrate  
 81 binding and catalysis had been identified in previous reports (9, 11, 12, 13, 15). Tyr52  
 82 and Phe299 are close to the methyl group of pyruvate. Although they are not as  
 83 important as Arg171 of L-nLDH for pyruvate binding, they influence the shape of  
 84 hydrophobic pocket for methyl group of pyruvate and thus are helpful for pyruvate  
 85 binding (3, 16). In D-nLDH of *L. casei* ATCC 334, Tyr52 and Phe299 were substituted  
 86 by Leu and Tyr, respectively. This would bring negative effect on its catalytic  
 87 efficiency as previous reports (8, 16).

88 TABLE S1. Strains, plasmids, and oligonucleotide primers used in this study

| Strain, plasmid, or primer      | Relevant characteristics                                                                                                                                                                    | Source or reference          |
|---------------------------------|---------------------------------------------------------------------------------------------------------------------------------------------------------------------------------------------|------------------------------|
| <i>E. coli</i> strain           |                                                                                                                                                                                             |                              |
| <i>E. coli</i> DH5 $\alpha$     | $\phi$ 80 <i>lacZ</i> $\Delta$ M15 $\Delta$ ( <i>lacZYA-argF</i> ) U169<br><i>recA1 endA1 hsdR17 supE44<math>\lambda</math>- thi-1</i>                                                      | Invitrogen Life Technologies |
| <i>E. coli</i> Rosetta(DE3)     | F <sup>-</sup> <i>ompT hsdS<sub>B</sub>(r<sub>B</sub><sup>-</sup>m<sub>B</sub><sup>-</sup>) gal dcm lacY1</i><br>(DE3) pRARE( <i>argU, argW, ileX, glyT, leuW, proL</i> )(Cm <sup>r</sup> ) | Novagen                      |
| <i>Lactobacillus</i> strain     |                                                                                                                                                                                             |                              |
| <i>L. bulgaricus</i> ATCC 11842 | Wild-type D-lactic acid producing strain                                                                                                                                                    | ATCC                         |
| <i>L. plantarum</i> ATCC 14917  | Wild-type DL-lactic acid producing strain                                                                                                                                                   | ATCC                         |
| <i>L. casei</i> ATCC 334        | Wild-type L-lactic acid producing strain                                                                                                                                                    | ATCC                         |
| Plasmid                         |                                                                                                                                                                                             |                              |
| pETDuet-1                       | Expression vector, Amp <sup>r</sup>                                                                                                                                                         | Novagen                      |
| pETDuet-11842 <i>ldhL</i>       | N-terminal His-tagged <i>ldhL</i> of <i>L. bulgaricus</i> ATCC 11842 in pETDuet-1                                                                                                           | This study                   |
| pETDuet-11842 <i>ldhD</i>       | N-terminal His-tagged <i>ldhD</i> of <i>L. bulgaricus</i> ATCC 11842 in pETDuet-1                                                                                                           | This study                   |
| pETDuet-14917 <i>ldhL</i>       | N-terminal His-tagged <i>ldhL</i> of <i>L. plantarum</i> ATCC 14917 in pETDuet-1                                                                                                            | This study                   |
| pETDuet-14917 <i>ldhD</i>       | N-terminal His-tagged <i>ldhD</i> of <i>L. plantarum</i> ATCC 14917 in pETDuet-1                                                                                                            | This study                   |
| pETDuet-334 <i>ldhL</i>         | N-terminal His-tagged <i>ldhL</i> of <i>L. casei</i> ATCC 334 in pETDuet-1                                                                                                                  | This study                   |
| pETDuet-334 <i>ldhD</i>         | N-terminal His-tagged <i>ldhD</i> of <i>L. casei</i> ATCC 334 in pETDuet-1                                                                                                                  | This study                   |
| Oligonucleotide primer          |                                                                                                                                                                                             |                              |
| q11842 <i>ldhL</i> .f           | Sequence (5'→3') and properties <sup>a</sup><br>TGACAGAAGCAGCCTTAGATG                                                                                                                       |                              |
| q11842 <i>ldhL</i> .r           | GCCACGCCATAGTAGGTTG                                                                                                                                                                         |                              |
| q11842 <i>ldhD</i> .f           | AAGATGAGCCTGCGTAAC                                                                                                                                                                          |                              |
| q11842 <i>ldhD</i> .r           | TTCGTCCATAGCCTTGTC                                                                                                                                                                          |                              |
| q14917 <i>ldhL</i> .f           | ATCCTCGTTCCGTTGATG                                                                                                                                                                          |                              |
| q14917 <i>ldhL</i> .r           | AAGTTGATGATGTCGTAAGC                                                                                                                                                                        |                              |
| q14917 <i>ldhD</i> .f           | TGGTGTTATCGGTACTGGTC                                                                                                                                                                        |                              |
| q14917 <i>ldhD</i> .r           | TGTGGTAGTTATCCTTCAATGC                                                                                                                                                                      |                              |

|             |                                                           |
|-------------|-----------------------------------------------------------|
| q334ldhL.f  | GCCGTTGGTTCAAGTTATGC                                      |
| q334ldhL.r  | GCGTTGCTCAAGTCAATCG                                       |
| q334ldhD.f  | CCGAGGACTTGTTGAATC                                        |
| q334ldhD.r  | GGTGTAGTAGGCAATGTG                                        |
| 11842ldhL.f | GCG <u>AAGCTT</u> ATGAAAAAGGTCAATCGTAT ( <i>HindIII</i> ) |
| 11842ldhL.r | TAT <u>CTCGAGT</u> CCTAAAGAGTCCAGGGTTG ( <i>XhoI</i> )    |
| 11842ldhD.f | CGC <u>CTGCAGAT</u> GACTAAAATTTTTGCTTA ( <i>PstI</i> )    |
| 11842ldhD.r | TAT <u>CTCGAGG</u> CCAACCTTAACTGGAGTTT ( <i>XhoI</i> )    |
| 14917ldhL.f | TAT <u>CTGCAGAT</u> GTCAAGCATGCCAAATCA ( <i>PstI</i> )    |
| 14917ldhL.r | GCG <u>CTCGAGT</u> TTTATTTTCTAATTCAGCTA ( <i>XhoI</i> )   |
| 14917ldhD.f | CGC <u>AAGCTT</u> ATGAAAATTATTGCATATGC ( <i>HindIII</i> ) |
| 14917ldhD.r | TAT <u>CTCGAGG</u> TCAAACCTTAACTTGTGTGT ( <i>XhoI</i> )   |
| 334ldhL.f   | GTG <u>CTGCAGG</u> TGGCAAGTATTACGGATAA ( <i>PstI</i> )    |
| 334ldhL.r   | TGT <u>CTCGAGC</u> TGACGAGTTTCGATGTCAT ( <i>XhoI</i> )    |
| 334ldhD.f   | CGC <u>AAGCTT</u> ATGAAGATTATTGCTTACGG ( <i>HindIII</i> ) |
| 334ldhD.r   | TAT <u>CTCGAGC</u> TTTGCTGGACCAGTAACTT ( <i>XhoI</i> )    |

---

89 <sup>a</sup>For protein expression, oligonucleotides were designed to introduce recognition sites for  
90 restriction endonucleases (recognition sites underlined, restriction endonucleases indicated in  
91 parentheses).

92 TABLE S2. List of sequences included in the alignment and phylogenetic analysis

| Assignment | Organisms and relevant type <sup>a</sup> | Accession number | Reference                        |
|------------|------------------------------------------|------------------|----------------------------------|
| L-nLDH     | <i>L. bulgaricus</i> ATCC 11842 (D)      | CAI96961         | NCBI prokaryotic genome database |
| L-nLDH     | <i>L. bulgaricus</i> ATCC BAA-365 (D)    | ABJ57783         | NCBI prokaryotic genome database |
| L-nLDH     | <i>L. jensenii</i> 1153 (D)              | EEQ68605         | NCBI prokaryotic genome database |
| L-nLDH     | <i>L. jensenii</i> 269-3 (D)             | EEQ24781         | NCBI prokaryotic genome database |
| L-nLDH     | <i>L. plantarum</i> ATCC 14917 (DL)      | EFK28653         | NCBI prokaryotic genome database |
| L-nLDH     | <i>L. plantarum</i> JDM1 (DL)            | ACT61325         | NCBI prokaryotic genome database |
| L-nLDH     | <i>L. pentosus</i> DSM 20314 (DL)        | BAA14353         | 14                               |
| L-nLDH     | <i>L. fermentum</i> IFO 3956 (DL)        | BAG27142         | NCBI prokaryotic genome database |
| L-nLDH     | <i>L. fermentum</i> CECT 5716 (DL)       | ADJ41146         | NCBI prokaryotic genome database |
| L-nLDH     | <i>L. reuteri</i> CF48-3A (DL)           | EEI65172         | NCBI prokaryotic genome database |
| L-nLDH     | <i>L. buchneri</i> ATCC 11577 (DL)       | EEI19802         | NCBI prokaryotic genome database |
| L-nLDH     | <i>L. brevis</i> ATCC 27305 (DL)         | EEI71300         | NCBI prokaryotic genome database |
| L-nLDH     | <i>L. rhamnosus</i> Lc 705 (L)           | CAR91366         | NCBI prokaryotic genome database |
| L-nLDH     | <i>L. rhamnosus</i> GG (L)               | CAR88418         | NCBI prokaryotic genome database |
| L-nLDH     | <i>L. casei</i> ATCC 334 (L)             | ABJ71272         | NCBI prokaryotic genome database |
| L-nLDH     | <i>L. casei</i> BL23 (L)                 | CAQ67767         | NCBI prokaryotic genome database |
| L-nLDH     | <i>X. cellulositica</i> DSM 15894        | ACZ30288         | NCBI prokaryotic genome database |
| D-nLDH     | <i>L. bulgaricus</i> ATCC 11842 (D)      | CAI96942         | NCBI prokaryotic genome database |
| D-nLDH     | <i>L. bulgaricus</i> ATCC BAA-365 (D)    | ABJ57770         | NCBI prokaryotic genome database |
| D-nLDH     | <i>L. jensenii</i> 1153 (D)              | EEQ68030         | NCBI prokaryotic genome database |
| D-nLDH     | <i>L. jensenii</i> 269-3 (D)             | EEQ23913         | NCBI prokaryotic genome database |
| D-nLDH     | <i>L. plantarum</i> ATCC 14917 (DL)      | EFK29428         | NCBI prokaryotic genome database |
| D-nLDH     | <i>L. plantarum</i> JDM1 (DL)            | ACT62606         | NCBI prokaryotic genome database |
| D-nLDH     | <i>L. pentosus</i> DSM 20314 (DL)        | BAA14352         | 14                               |
| D-nLDH     | <i>L. fermentum</i> IFO 3956 (DL)        | BAG26968         | NCBI prokaryotic genome database |
| D-nLDH     | <i>L. fermentum</i> CECT 5716 (DL)       | ADJ41057         | NCBI prokaryotic genome database |
| D-nLDH     | <i>L. reuteri</i> CF48-3A (DL)           | EEI64675         | NCBI prokaryotic genome database |
| D-nLDH     | <i>L. buchneri</i> ATCC 11577 (DL)       | EEI18861         | NCBI prokaryotic genome database |
| D-nLDH     | <i>L. brevis</i> ATCC 27305 (DL)         | EEI69958         | NCBI prokaryotic genome database |
| D-nLDH     | <i>L. rhamnosus</i> Lc 705 (L)           | CAR88994         | NCBI prokaryotic genome database |
| D-nLDH     | <i>L. rhamnosus</i> GG (L)               | CAR86053         | NCBI prokaryotic genome database |
| D-nLDH     | <i>L. casei</i> ATCC 334 (L)             | ABJ69009         | NCBI prokaryotic genome database |



|        |                          |           |                                  |
|--------|--------------------------|-----------|----------------------------------|
| D-nLDH | <i>L. casei</i> BL23 (L) | CAQ65269  | NCBI prokaryotic genome database |
| D-nLDH | <i>E. coli</i> MG1655    | NP_415898 | NCBI prokaryotic genome database |

---

93 <sup>a</sup>LAB, including *Lactobacillus* genus, were classified into 3 types (L-LAB, DL-LAB, and D-LAB)  
94 based on the stereoisomer of lactic acid. L-LAB means the main product is L-lactic acid; DL-LAB  
95 means the main product is DL-lactic acid; D-LAB means the main product is D-lactic acid. All the  
96 selected *Lactobacillus* strains were frequently used lactic acid producers and their relevant types  
97 were in accordance with the previous reports (1, 10).

98   **REFERENCES**

- 99   **1. Brenner, D., J. Staley, and N. Krieg.** 2001. Bergey's manual of systematic  
100       bacteriology. Springer-Verlag, New York, 2nd Ed.
- 101   **2. Clarke, A. R., D. B. Wigley, W. N. Chia, D. A. Barstow, T. Atkinson, and J. J.**  
102       **Holbrook.** 1986. Site-directed mutagenesis reveals role of mobile arginine residue  
103       in lactate dehydrogenase catalysis. *Nature* **324**:699–702.
- 104   **3. Dengler, U., K. Niefind, M. Kieß, and D. Schomburg.** 1997. Crystal structure of  
105       a ternary complex of D-2-hydroxyisocaproate dehydrogenase from *Lactobacillus*  
106       *casei*, NAD<sup>+</sup> and 2-oxoisocaproate at 1.9 Å resolution. *J. Mol. Biol.* **267**:640–660.
- 107   **4. Dunn, C. R., H. M. Wilks, D. J. Halsall, T. Atkinson, A. R. Clarke, H.**  
108       **Muirhead, and J. J. Holbrook.** 1991. Design and synthesis of new enzymes  
109       based on the lactate dehydrogenase framework. *Phil. Trans. R. Soc. Lond. B*  
110       **332**:177–184.
- 111   **5. Hart, K. W., A. R. Clarke, D. B. Wigley, W. N. Chia, D. A. Barstow, T.**  
112       **Atkinson, and J. J. Holbrook.** 1987. The importance of arginine 171 in substrate  
113       binding by *Bacillus stearothermophilus* lactate dehydrogenase. *Biochem. Biophys.*  
114       *Res. Commun.* **146**:346–353.
- 115   **6. Hart, K. W., A. R. Clarke, D. B. Wigley, A. D. B. Waldman, W. N. Chia, D. A.**  
116       **Barstow, T. Atkinson, J. B. Jones, and J. J. Holbrook.** 1987. A strong  
117       carboxylate-arginine interaction is important in substrate orientation and  
118       recognition in lactate dehydrogenase. *Biochim. Biophys. Acta, Protein Struct. Mol.*  
119       *Enzymol.* **914**:294–298.

- 120 **7. Holbrook, J. J., A. Liljas, S. J. Steindel, and M. G. Rossmann.** 1975. in The  
121 Enzymes (Boyer, P. D., ed) Vol. 11, 3rd Ed., pp. 191–292, Academic Press, New  
122 York.
- 123 **8. Ishikura, Y., S. Tsuzuki, O. Takahashi, C. Tokuda, R. Nakanishi, T. Shinoda,**  
124 **and H. Taguchi.** 2005. Recognition site for the side chain of 2-ketoacid substrate  
125 in D-lactate dehydrogenase. *J. of Biochem.* **138**:741–749.
- 126 **9. Kochhar, S., N. Chuard, and H. Hottinger.** 1992. Glutamate 264 modulates the  
127 pH dependence of the NAD<sup>+</sup>-dependent D-lactate dehydrogenase. *J. Biol. Chem.*  
128 **267**:20298–20301.
- 129 **10. Manome, A., S. Okada, T. Uchimura, and K. Komagata.** 1998. The ratio of  
130 L-form to D-form of lactic acid as criteria for the identification of lactic acid  
131 bacteria. *J. Gen. Appl. Microbiol.* **44**:371–374.
- 132 **11. Razeto, A., S. Kochhar, H. Hottinger, M. Dauter, K. S. Wilson, and V. S.**  
133 **Lamzin.** 2002. Domain closure, substrate specificity and catalysis of D-lactate  
134 dehydrogenase from *Lactobacillus bulgaricus*. *J. Mol. Biol.* **318**:109–119.
- 135 **12. Shinoda, T., K. Arai, M. Shigematsu-Iida, Y. Ishikura, S. Tanaka, T. Yamada,**  
136 **M. S. Kimber, E. F. Pai, S. Fushinobu, and H. Taguchi.** 2005. Distinct  
137 conformation-mediated functions of an active site loop in the catalytic reactions of  
138 NAD-dependent D-lactate dehydrogenase and formate dehydrogenase. *J. Biol.*  
139 *Chem.* **280**:17068–17075.
- 140 **13. Stoll, V. S., M. S. Kimber, and E. F. Pai.** 1996. Insights into substrate binding  
141 by D-2-ketoacid dehydrogenases from the structure of *Lactobacillus pentosus*

- 142 D-lactate dehydrogenase. *Structure* **4**:437–447.
- 143 **14. Taguchi, H., and T. Ohta.** 1991. D-lactate dehydrogenase is a member of the  
144 D-isomer-specific 2-hydroxyacid dehydrogenase family. Cloning, sequencing, and  
145 expression in *Escherichia coli* of the D-lactate dehydrogenase gene of  
146 *Lactobacillus plantarum*. *J. Biol. Chem.* **266**:12588–12594.
- 147 **15. Taguchi, H., and T. Ohta.** 1993. Histidine 296 is essential for the catalysis in  
148 *Lactobacillus plantarum* D-lactate dehydrogenase. *J. Biol. Chem.*  
149 **268**:18030–18034.
- 150 **16. Tokuda, C., Y. Ishikura, M. Shigematsu, H. Mutoh, S. Tsuzuki, Y. Nakahira,**  
151 **Y. Tamura, T. Shinoda, K. Arai, O. Takahashi, and H. Taguchi.** 2003.  
152 Conversion of *Lactobacillus pentosus* D-lactate dehydrogenase to a  
153 D-hydroxyisocaproate dehydrogenase through a single amino acid replacement. *J.*  
154 *Bacteriol.* **185**:5023–5026.
